# Supplementary material for: Targeting MS4A4A on tumour-associated macrophages restores CD8+ T-cell-mediated antitumour immunity
Source: PubMed Central journal article supplement — Gut. 2023 Jul 28;72(12):2307–20. doi: 10.1136/gutjnl-2022-329147 (PMC10715532; doi:10.1136/gutjnl-2022-329147), 2023-07-28
Supplement: gutjnl-2022-329147supp019.pdf [file gutjnl-2022-329147supp019.pdf]

**KEY RESOURCES TABLE**

| <b>REAGENT or RESOURCE</b>                             | <b>SOURCE</b>            | <b>IDENTIFIER</b>     |
|--------------------------------------------------------|--------------------------|-----------------------|
| <b>Antibodies</b>                                      |                          |                       |
| PE anti-mouse CD45 antibody                            | Biolegend                | Clone no. 30-F11      |
| APC anti-mouse CD3ε antibody                           | Biolegend                | Clone no. 145-2C11    |
| FITC anti-mouse CD8a antibody                          | Biolegend                | Clone no. 53-6.7      |
| PerCP/Cyanine5.5 anti-mouse CD223 (LAG-3) antibody     | Biolegend                | Clone no. C9B7W       |
| PE/Cyanine7 anti-mouse CD279 antibody                  | Biolegend                | Clone no. 29F.1A12    |
| Brilliant Violet 421 anti-mouse CD366 (Tim-3) antibody | Biolegend                | Clone no. B8.2C12     |
| Brilliant Violet 421 anti-mouse Ki-67 antibody         | Biolegend                | Clone no.16A8         |
| Brilliant Violet 421 anti-mouse IFN-γ antibody         | Biolegend                | Clone no. XMG1.2      |
| PE anti-mouse F4/80 antibody                           | Biolegend                | Clone no. BM8         |
| Alexa Fluor® 700 anti-mouse/human CD11b antibody       | Biolegend                | Clone no. M1/70       |
| APC anti-mouse CD206 antibody                          | Thermo Fisher Scientific | Clone no. MR6F3       |
| APC anti-mouse iNOS antibody                           | Thermo Fisher Scientific | Clone no. CXNFT       |
| APC anti-mouse CD3 antibody                            | Thermo Fisher Scientific | Clone no. 145-2C11    |
| FITC anti-mouse CD45 antibody                          | Biolegend                | Clone no. 30-F11      |
| PerCP/Cyanine5.5 anti-mouse NK1.1 antibody             | Biolegend                | Clone no. PK136       |
| FITC anti-mouse CD4 antibody                           | Biolegend                | Clone no. RM4-5       |
| Brilliant Violet 421 anti-mouse CD8 antibody           | Biolegend                | Clone no. 53-6.7      |
| Brilliant Violet 421 anti-mouse Ly6G antibody          | Biolegend                | Clone no. 1A8         |
| PE-Cyanine 7 anti-mouse Ly6C antibody                  | Biolegend                | Clone no. HK1.4       |
| APC anti-mouse IL10 antibody                           | Biolegend                | Clone no. JES5-16E3   |
| Brilliant Violet 421 anti-mouse CD45.1 antibody        | Biolegend                | Clone no. A20         |
| APC-Cyanine 7 anti-mouse CD45.2 antibody               | Biolegend                | Clone no. 104         |
| PE/Cyanine7 anti-mouse CD19 antibody                   | Biolegend                | Clone no. 6D5         |
| Brilliant Violet 510 anti-mouse CD11b antibody         | Biolegend                | Clone no. M1/70       |
| Anti-mouse CD16/32 antibody                            | Biolegend                | Clone no. 93          |
| Anti-mouse CD45 antibody                               | Biolegend                | Clone no. 30-F11      |
| Anti-mouse CD3ε Antibody                               | Biolegend                | Clone no. 145-2C11    |
| Anti-mouse CD103 antibody                              | Biolegend                | Clone no. 2E7         |
| Anti-mouse CD95(Fas) antibody                          | Biolegend                | Clone no. SA367H8     |
| Anti-mouse MHC II(I-A/I-E) antibody                    | Biolegend                | Clone no. M5/114.15.2 |
| Anti-mouse CD44 antibody                               | Biolegend                | Clone no. IM7         |
| Anti-mouse Gr-1(Ly-6G/Ly-6C) antibody                  | Biolegend                | Clone no. RB6-8C5     |
| Anti-mouse CD206(MMR) antibody                         | Biolegend                | Clone no. C068C2      |

| <b>Continued</b>                            |                |                     |
|---------------------------------------------|----------------|---------------------|
| <b>REAGENT or RESOURCE</b>                  | <b>SOURCE</b>  | <b>IDENTIFIER</b>   |
| Anti-mouse Ly6C antibody                    | Biolegend      | Clone no. HK1.4     |
| Anti-mouse Ly6G antibody                    | Biolegend      | Clone no. 1A8       |
| Anti-mouse CX3CR1 antibody                  | Biolegend      | Clone no. SA011F11  |
| Anti-mouse CD127(IL-7R $\alpha$ ) antibody  | Biolegend      | Clone no. A7R34     |
| Anti-mouse CD19 antibody                    | Biolegend      | Clone no. 6D5       |
| Anti-mouse CD278(ICOS) antibody             | Biolegend      | Clone no. C398.4A   |
| Anti-mouse SiglecF antibody                 | BD Biosciences | Clone no. E50-2440  |
| Anti-mouse Ki67 antibody                    | eBioscience    | Clone no. SolA15    |
| Anti-mouse CD11c antibody                   | Biolegend      | Clone no. N418      |
| Anti-mouse CD39 antibody                    | Biolegend      | Clone no. 5F2       |
| Anti-mouse TIGIT(VSTM3) antibody            | R&D Systems    | Clone no. 2190A     |
| Anti-mouse CD45R(B220) antibody             | Biolegend      | Clone no. RA3-6B2   |
| Anti-mouse F4/80 antibody                   | BioRAD         | Clone no. C1:A3-1   |
| Anti-mouse TCR $\beta$ antibody             | Biolegend      | Clone no. H57-597   |
| Anti-mouse iNOS antibody                    | eBioscience    | Clone no. CXNFT     |
| Anti-mouse PD-L1 antibody                   | Biolegend      | Clone no. 10F.9G2   |
| Anti-mouse CD25 antibody                    | Biolegend      | Clone no. 3C7       |
| Anti-mouse CD192(CCR2) antibody             | R&D Systems    | Clone no. 475301    |
| Anti-mouse CD64(Fc $\gamma$ RI) antibody    | Biolegend      | Clone no. X54-5/7.1 |
| Anti-mouse TCR $\gamma/\delta$ antibody     | Biolegend      | Clone no. GL3       |
| Anti-mouse CD49b antibody                   | Biolegend      | Clone no. DX5       |
| Anti-mouse CD27 antibody                    | Biolegend      | Clone no. LG.3A10   |
| Anti-mouse CD62L antibody                   | Biolegend      | Clone no. MEL-14    |
| Anti-mouse T-bet antibody                   | Biolegend      | Clone no. 4B10      |
| Anti-mouse CD69 antibody                    | Biolegend      | Clone no. H1.2F3    |
| Anti-mouse PD-1(PD-1) antibody              | Biolegend      | Clone no. 29F.1A12  |
| Anti-mouse CD172a (SIRP $\alpha$ ) antibody | Biolegend      | Clone no. P84       |
| Anti-mouse Gata3 antibody                   | eBioscience    | Clone no. TWAJ      |
| Anti-mouse KLRG1 antibody                   | eBioscience    | Clone no. 2F1       |
| Anti-mouse CD366(Tim-3) antibody            | Biolegend      | Clone no. RMT3-23   |
| Anti-mouse CD4 antibody                     | Biolegend      | Clone no. RM4-5     |
| Anti-mouse CD8 antibody                     | Biolegend      | Clone no. 53-6.7    |
| Anti-mouse CD11b antibody                   | Biolegend      | Clone no. M1/70     |
| InVivoMab anti-mouse PD-1                   | Bio X Cell     | Cat no. BE0146      |
| InVivoMab rat IgG2a isotype control         | Bio X Cell     | Cat no. BE0089      |
| InVivoPlus anti-mouse CD8 $\alpha$          | Bio X Cell     | Cat no. BP0117      |
| InVivoPlus rat IgG2b I sotype control       | Bio X Cell     | Cat no. BP0090      |
| InVivoMab anti-mouse CD28                   | Bio X Cell     | Cat no. BE0015      |
| InVivoMab anti-mouse CD3                    | Bio X Cell     | Cat no. BE0002      |
| InVivoMab anti-mouse CSF1R                  | Bio X Cel      | Cat no. BE0213      |
| InVivoMab anti-mouse CD16/CD32              | Bio X Cel      | Cat no. BE0307      |

| <b>Continued</b>                         |                          |                    |
|------------------------------------------|--------------------------|--------------------|
| <b>REAGENT or RESOURCE</b>               | <b>SOURCE</b>            | <b>IDENTIFIER</b>  |
| Anti-human MS4A4A antibody               | Abcam                    | Cat no. ab67134    |
| Anti-mouse MS4A4A mAb                    | This paper               | Clone no. 3G7      |
| Anti-human MS4A4A antibody               | Sigma-Aldrich            | Cat no. HPA029323  |
| Anti-mouse MS4A4A antibody               | ABclonal                 | Cat no. A18334     |
| Anti-human CD68 antibody                 | Abcam                    | Cat no. ab213363   |
| Anti-mouse AKT antibody                  | Proteintech              | Cat no.10176-2-AP  |
| Anti-mouse phospho-AKT (Ser473) antibody | Proteintech              | Cat no. 66444-1    |
| Anti-mouse STAT6 antibody                | Proteintech              | Cat no. 51073-1-AP |
| Anti-mouse phospho-STAT6 (Y641) antibody | Abcam                    | Cat no. ab263947   |
| Anti-mouse STAT3 antibody                | Proteintech              | Cat no.10253-2-AP  |
| Anti-mouse phospho-STAT3 (Y705) antibody | ABclonal                 | Cat no. AP0070     |
| Anti-mouse alpha Tubulin antibody        | Proteintech              | Cat no.11224-1-AP  |
| Anti-mouse/human $\beta$ -actin antibody | Proteintech              | Cat no. 20536-1-AP |
| Anti-mouse F4/80 antibody                | Cell Signaing Technology | Cat no. 70076S     |
| Anti-mouse CD206 antibody                | Cell Signaing Technology | Cat no. 24595S     |
| Anti-mouse CD8 antibody                  | Abcam                    | Cat no. ab209775   |
| Anti-mouse CD206 antibody                | Proteintech              | Cat no.18704-1-AP  |
| Anti-mouse/human GFP antibody            | Cell Signaing Technology | Cat no. 2956S      |
| Anti-human CD31 antibody                 | Proteintech              | Cat no. 66065-2-Ig |
| Anti-human MPO antibody                  | Proteintech              | Cat no. 22225-1-AP |
| Anti-human SMA antibody                  | Proteintech              | Cat no. 14395-1-AP |
| Anti-human EPCAM antibody                | Proteintech              | Cat no. 21050-1-AP |
| Anti-human CD11c antibody                | Proteintech              | Cat no. 60258-1-Ig |
| Anti-mouse Arg1 antibody                 | Proteintech              | Cat no. 16001-1-AP |
| Anti-mouse/human CD3 antibody            | Proteintech              | Cat no. 17617-1-AP |
| <b>Chemicals</b>                         |                          |                    |
| Collagenase IV                           | Sigma-Aldrich            | Cat no. C4-22-1G   |
| DNase I                                  | Sigma-Aldrich            | Cat no. D5025      |
| Puromycin dihydrochloride                | Sigma-Aldrich            | Cat no. P883       |
| Azoxymethane                             | Sigma-Aldrich            | Cat no. A5486      |
| Dextran sodium sulfate                   | MP Biomedicals           | Cat no. 0216011080 |
| Recombinant Murine IL-2                  | PeptoTech                | Cat no. 212-12     |
| Phorbol 12-myristate 12-acetate (PMA)    | InvivoGen                | Cat no. tlr-pma    |
| Recombinant Human IL-4                   | PeptoTech                | Cat no. 200-04     |
| Recombinant Murine IL-4                  | PeptoTech                | Cat no. 214-14     |
| Recombinant Human IL-13                  | PeptoTech                | Cat no. 200-13     |
| Recombinant Murine IL-13                 | PeptoTech                | Cat no. 210-13     |
| Recombinant Human IFN- $\gamma$          | PeptoTech                | Cat no. 300-02     |
| Recombinant Murine IFN- $\gamma$         | PeptoTech                | Cat no. 315-05     |
| Dactolisib (BEZ235)                      | Selleck                  | Cat no. S1009      |

| <b>Continued</b>                                                   |                                                          |                     |
|--------------------------------------------------------------------|----------------------------------------------------------|---------------------|
| <b>REAGENT or RESOURCE</b>                                         | <b>SOURCE</b>                                            | <b>IDENTIFIER</b>   |
| AS1517499                                                          | Selleck                                                  | Cat no. S8685       |
| PI3K $\alpha$ inhibitors (HS-173)                                  | Selleck                                                  | Cat no. S7356       |
| PI3K $\delta$ inhibitors (IPI-3063)                                | Selleck                                                  | Cat no. S7335       |
| PI3K $\beta$ inhibitors (IPI-3063)                                 | Selleck                                                  | Cat no. S7335       |
| PI3K $\gamma$ inhibitors (IPI-549)                                 | Selleck                                                  | Cat no. S8330       |
| CFSE                                                               | eBioscience                                              | Cat no. 65-0850-84  |
| ACK Lysis Buffer                                                   | Leagene                                                  | Cat no. CS0001      |
| Fixation Buffer                                                    | Biolegend                                                | Cat no. 420801      |
| Cell Staining Buffer                                               | Biolegend                                                | Cat no. 420201      |
| RPMI-1640                                                          | GIBCO                                                    | Cat no. C11875      |
| DMEM                                                               | GIBCO                                                    | Cat no. C11995500BT |
| Monocyte attachment medium                                         | PromoCell                                                | Cat no. C-28051     |
| Macrophage Detachment Solution DXF                                 | PromoCell                                                | Cat no. C-41330     |
| Macrophages Base Medium                                            | PromoCell                                                | Cat no. C-28057     |
| Histopaque®-1077 (1.077g/ml)                                       | Sigma-Aldrich                                            | Cat.no. S-10771     |
| PrimeScript™ RT reagent Kit                                        | Takara                                                   | Cat no. RR037A      |
| SYBR Green 2xTaq mix                                               | Takara                                                   | Cat no. RR820A      |
| <b>Critical commercial assays</b>                                  |                                                          |                     |
| Mouse TGF- $\beta$ 1 Precoated ELISA Kit                           | Dakewe                                                   | Cat no.1217102      |
| Mouse IL-10 Precoated ELISA Kit                                    | Dakewe                                                   | Cat no.1211002      |
| 4-color multiple fluorescent immunohistochemical staining kit      | Absin                                                    | Cat no. abs50012    |
| TIANprep Mini Plasmid Kit                                          | TIANGEN                                                  | Cat no. DP103       |
| Advanced DNA RNA Transfection Reagent                              | Zeta Life                                                | Cat no. AD600075    |
| Cell Activation Cocktail (with Brefeldin A)                        | Biolegend                                                | Cat no. 423303      |
| Intracellular Staining Permeabilization Wash Buffer (10X)          | Biolegend                                                | Cat no. 421002      |
| FOXP3 Fix/Perm Buffer Set                                          | Biolegend                                                | Cat no. 42140       |
| Clophosome® -Neutral Liposomal Clodronate for Macrophage Depletion | FormuMax                                                 | Cat no. F70101C-N   |
| <b>Experimental models: Cell lines</b>                             |                                                          |                     |
| SW480                                                              | Fang Yuan et al., 2019                                   | N/A                 |
| HT29                                                               | Fang Yuan et al., 2019                                   | N/A                 |
| LoVo                                                               | Fang Yuan et al., 2019                                   | N/A                 |
| RKO                                                                | Fang Yuan et al., 2019                                   | N/A                 |
| THP-1                                                              | the Department of Pathology, Southern Medical University | N/A                 |
| HEK-293T                                                           | the Department of Pathology, Southern Medical University | N/A                 |

| <b>Continued</b>                                                               |                                                             |                                                                                                                       |
|--------------------------------------------------------------------------------|-------------------------------------------------------------|-----------------------------------------------------------------------------------------------------------------------|
| <b>Experimental models: Cell lines</b>                                         | <b>SOURCE</b>                                               | <b>IDENTIFIER</b>                                                                                                     |
| L929                                                                           | the Department of Pathology,<br>Southern Medical University | N/A                                                                                                                   |
| J774A.1                                                                        | the Department of Pathology,<br>Southern Medical University | N/A                                                                                                                   |
| RAW264.7                                                                       | the Department of Pathology,<br>Southern Medical University | N/A                                                                                                                   |
| MC38                                                                           | Mingdao Lin et al., 2021                                    | N/A                                                                                                                   |
| CT26                                                                           | Mingdao Lin et al., 2021                                    | N/A                                                                                                                   |
| B16F10                                                                         | the Department of Pathology,<br>Southern Medical University | N/A                                                                                                                   |
| <b>Experimental models:<br/>Organisms/strains</b>                              |                                                             |                                                                                                                       |
| Mouse: C57BL/6J                                                                | Laboratory Animal Center,<br>Southern Medical University.   | N/A                                                                                                                   |
| Mouse: BALB/c                                                                  | Laboratory Animal Center,<br>Southern Medical University.   | N/A                                                                                                                   |
| <b>Oligonucleotides</b>                                                        |                                                             |                                                                                                                       |
| siRNA targeting sequence: Ms4a4a #1: 5'-<br>CCUUGGGAUUGUGCAGAUUTT -3'          | GENECHEM Biotech                                            | N/A                                                                                                                   |
| siRNA targeting sequence: Ms4a4a #2: 5'-<br>GCAGCCUAGGCUUGAACAUUTT -3'         | GENECHEM Biotech                                            | N/A                                                                                                                   |
| In vivo siRNA targeting sequence: Ms4a4a #1:<br>5'- CCUUGGGAUUGUGCAGAUUTT -3'  | RiboBio                                                     | N/A                                                                                                                   |
| In vivo siRNA targeting sequence: Ms4a4a #2:<br>5'- GCAGCCUAGGCUUGAACAUUTT -3' | RiboBio                                                     | N/A                                                                                                                   |
| Primers for qRT-PCR, see Table S2                                              | This paper                                                  | N/A                                                                                                                   |
| <b>Recombinant DNA</b>                                                         |                                                             |                                                                                                                       |
| pLent-EF1a-FH-CMV-Puro-Ms4a4a                                                  | Vigene Biosciences                                          | N/A                                                                                                                   |
| pLent-EF1a-FH-CMV-Puro-MS4A4A                                                  | Vigene Biosciences                                          | N/A                                                                                                                   |
| <b>Software and Algorithms</b>                                                 |                                                             |                                                                                                                       |
| GraphPad Prism 8                                                               | GraphPad Software                                           | <a href="https://www.graphpad.com/scientific-software/prism/">https://www.graphpad.com/scientific-software/prism/</a> |
| ImageJ                                                                         | NIH                                                         | <a href="https://imagej.nih.gov/ij/">https://imagej.nih.gov/ij/</a>                                                   |
| FlowJo                                                                         | BD Biosciences                                              | <a href="https://www.flowjo.com/solutions/flowjo/downloads">https://www.flowjo.com/solutions/flowjo/downloads</a>     |
