# Supplementary figures and images for: Targeting MS4A4A on tumour-associated macrophages restores CD8+ T-cell-mediated antitumour immunity
Source: PubMed Central journal article supplement — Gut. 2023 Jul 28;72(12):2307–20. doi: 10.1136/gutjnl-2022-329147 (PMC10715532; doi:10.1136/gutjnl-2022-329147), 2023-07-28

**A**

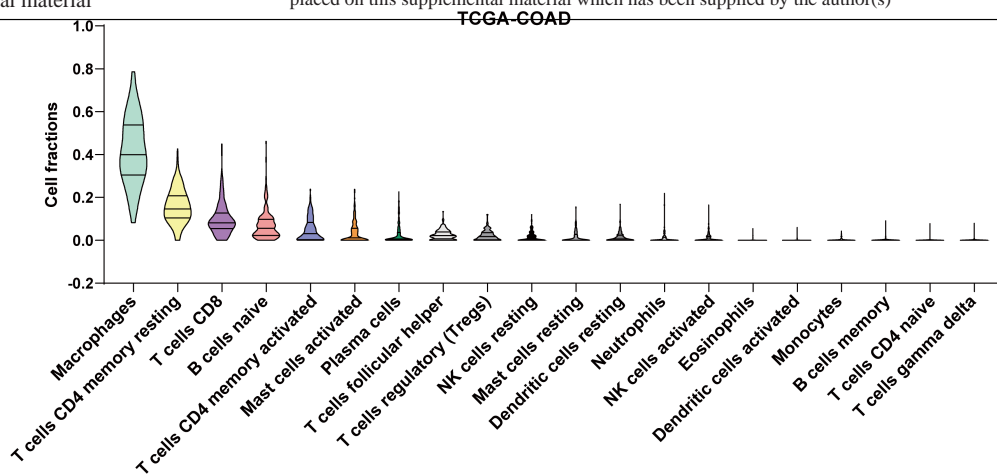

**B**

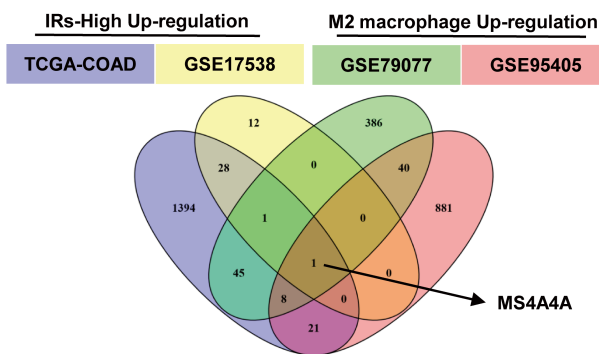

**C**

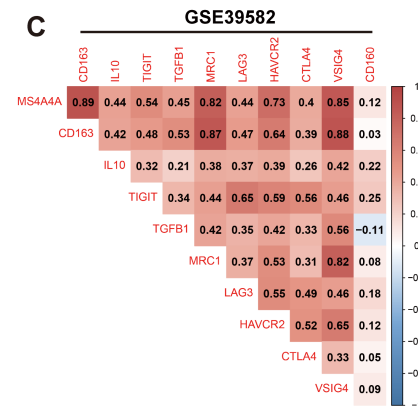

**D**

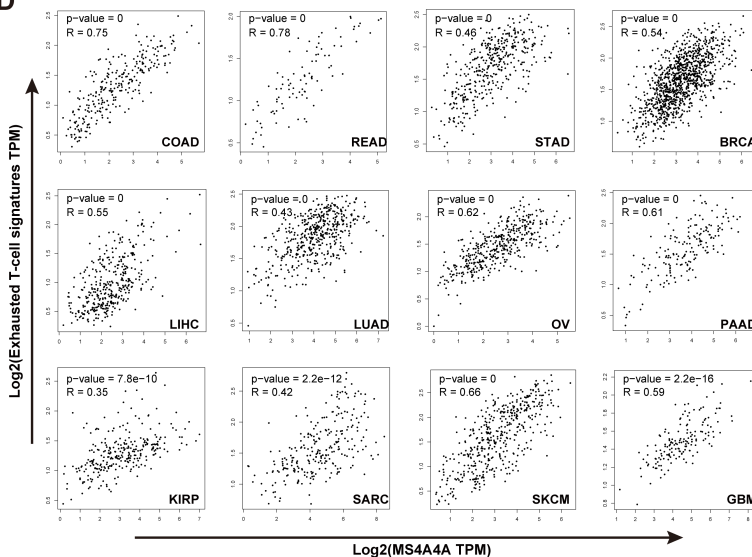

**E**

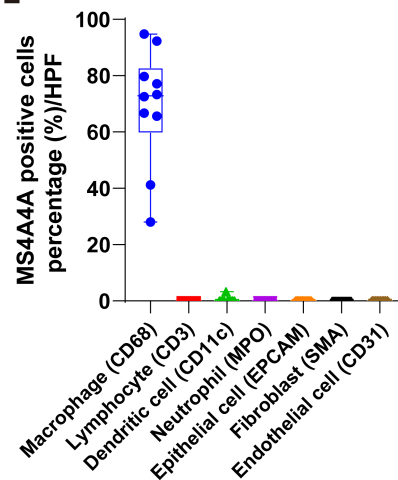

Supplement: gutjnl-2022-329147supp001.pdf [file gutjnl-2022-329147supp001.pdf]

**GSE146771(SMART-Seq2 scRNAseq)**

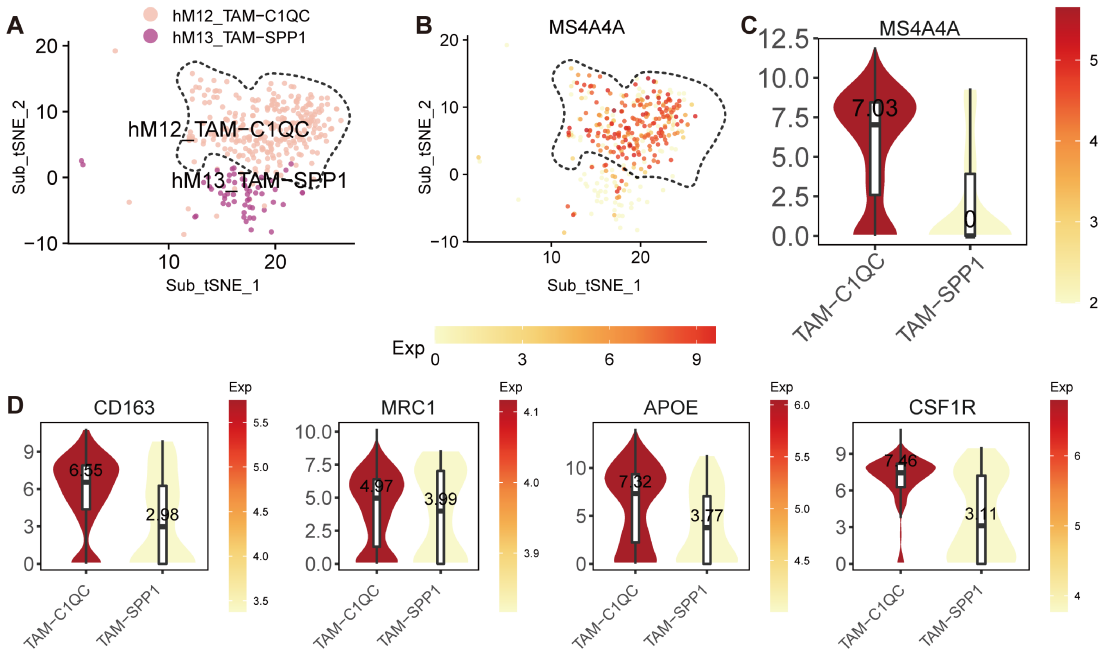

**GSE146771(10X scRNAseq)**

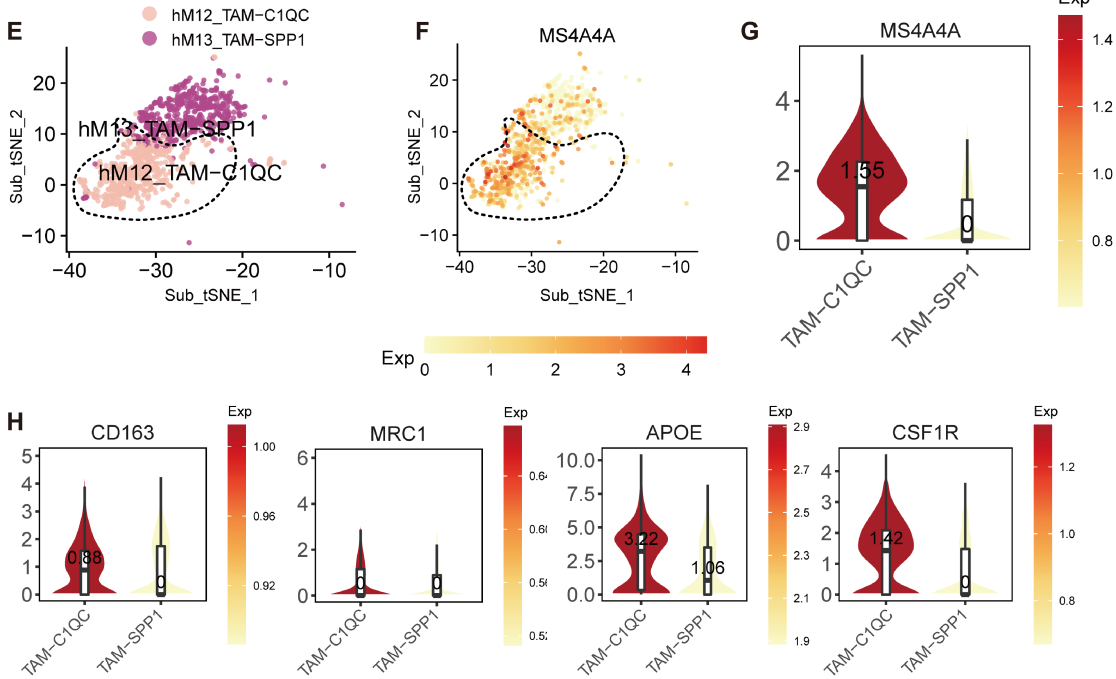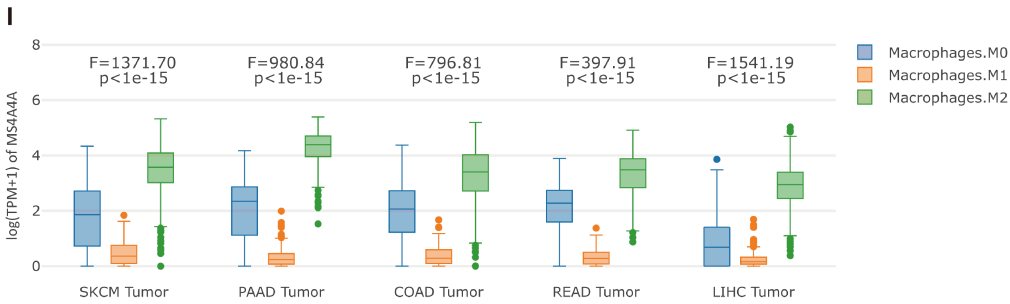

Supplement: gutjnl-2022-329147supp002.pdf [file gutjnl-2022-329147supp002.pdf]

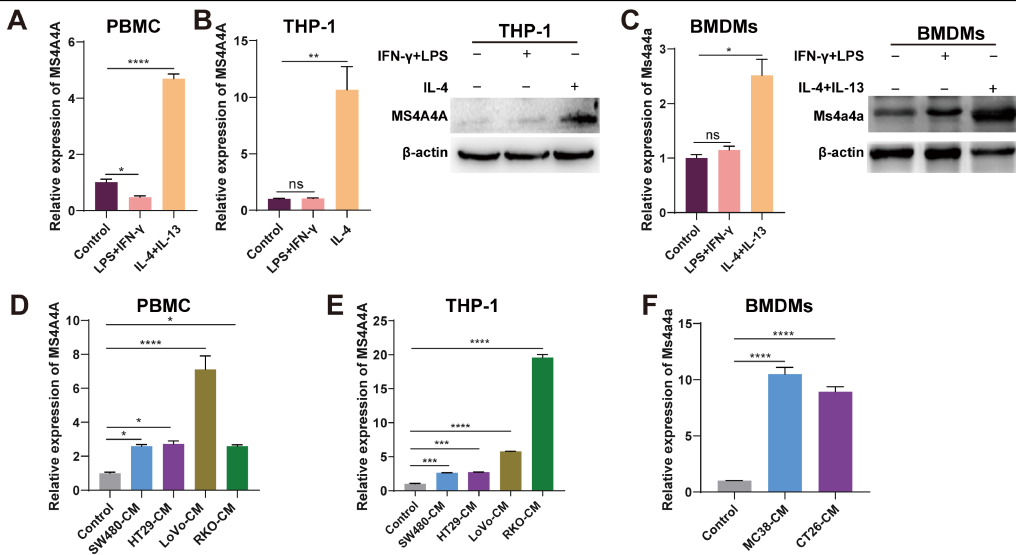

Supplement: gutjnl-2022-329147supp003.pdf [file gutjnl-2022-329147supp003.pdf]

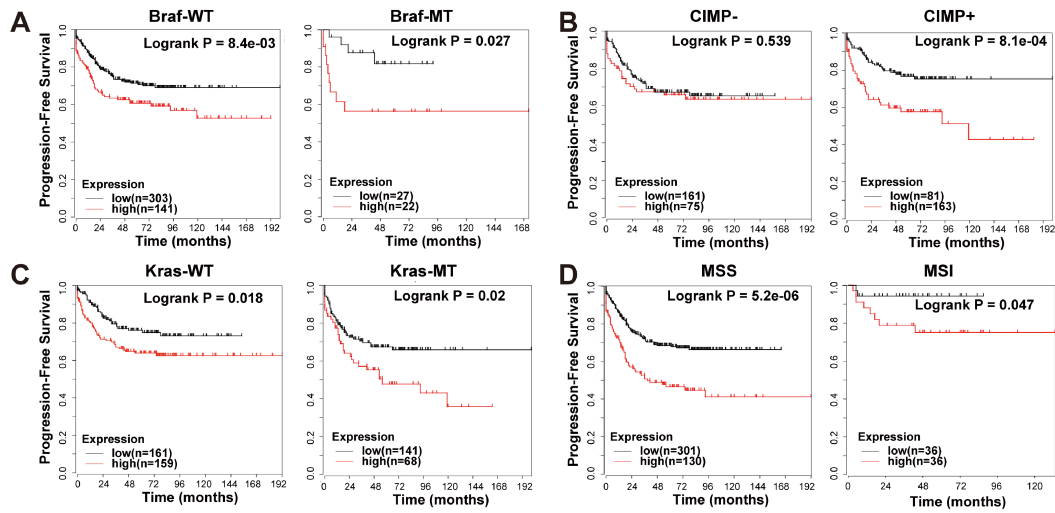

Supplement: gutjnl-2022-329147supp004.pdf [file gutjnl-2022-329147supp004.pdf]

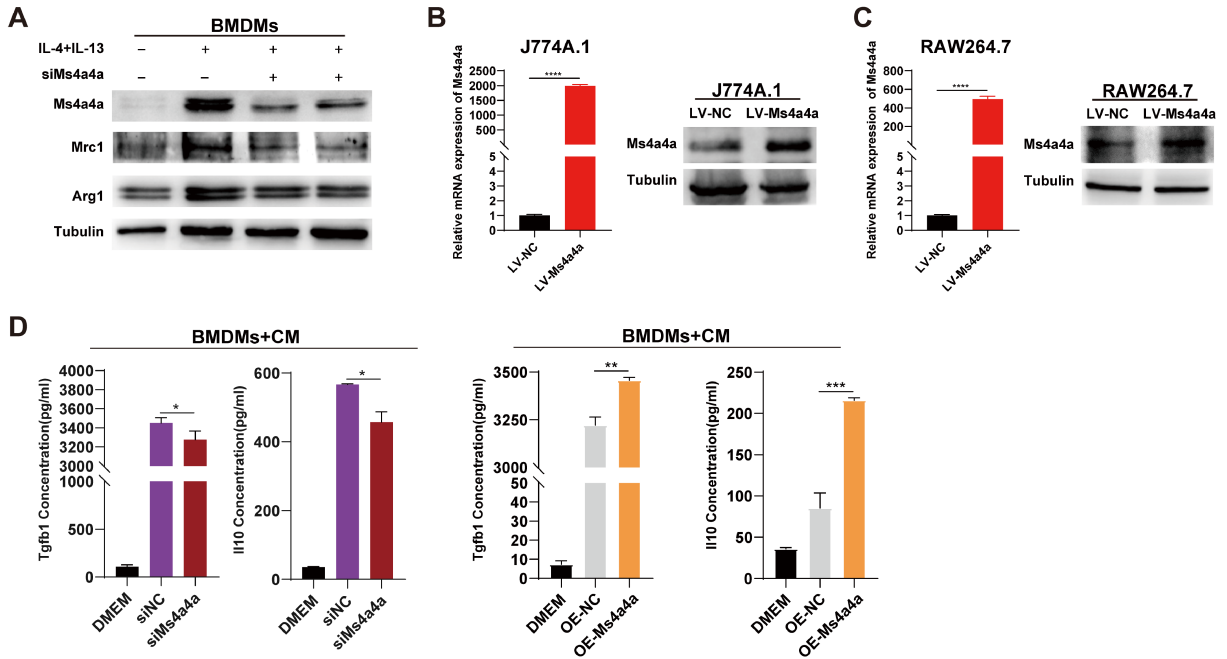

Supplement: gutjnl-2022-329147supp005.pdf [file gutjnl-2022-329147supp005.pdf]

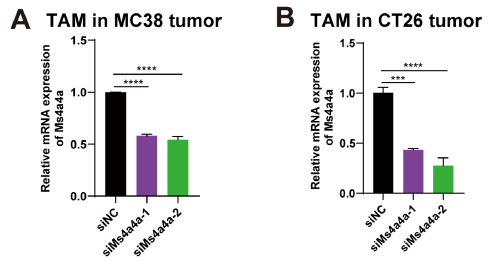

Supplement: gutjnl-2022-329147supp006.pdf [file gutjnl-2022-329147supp006.pdf]

Lymphocytes

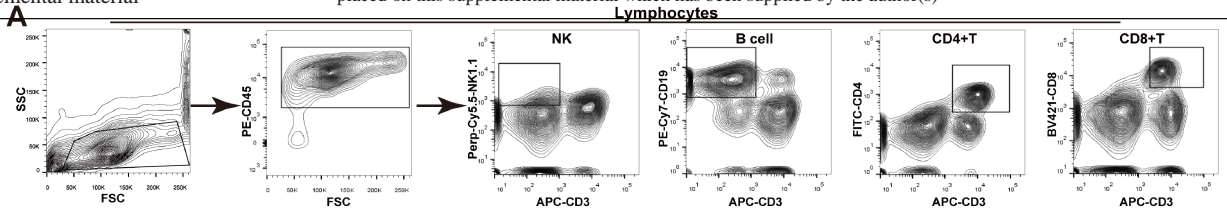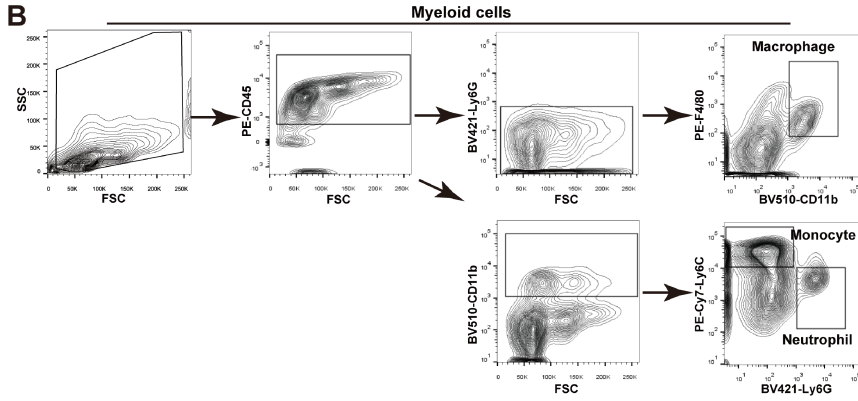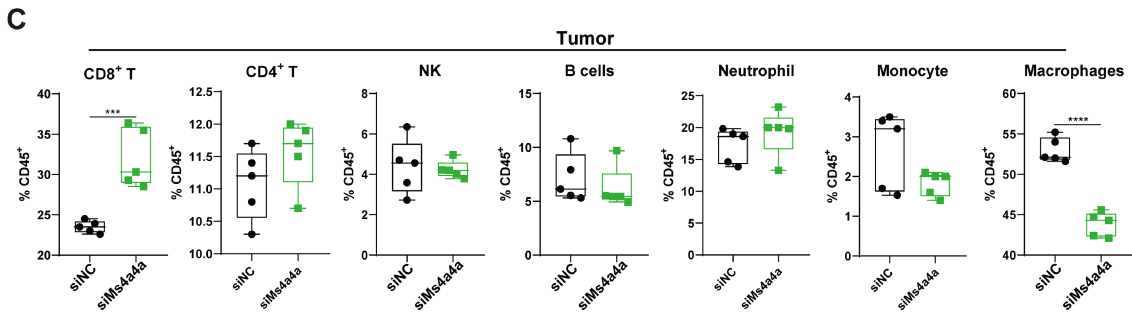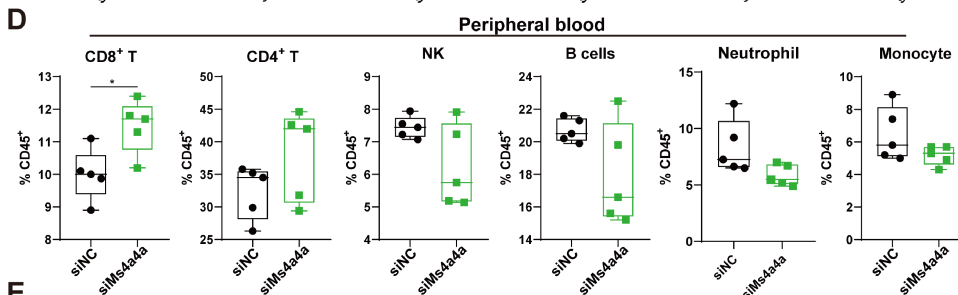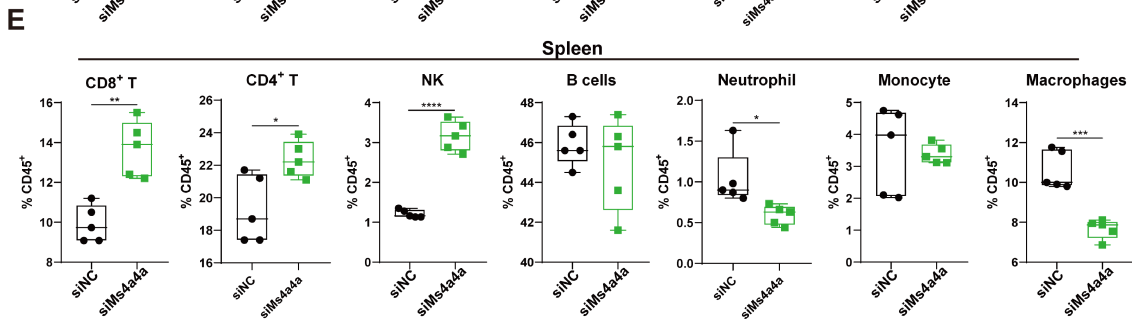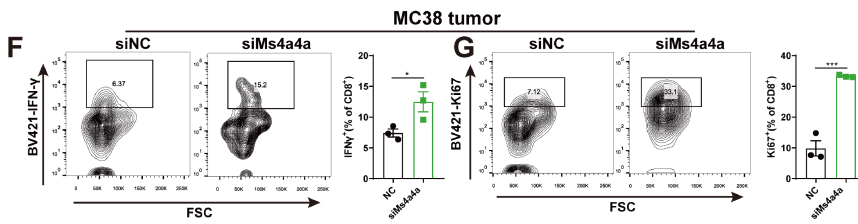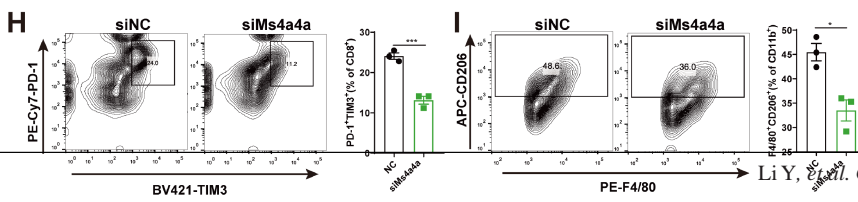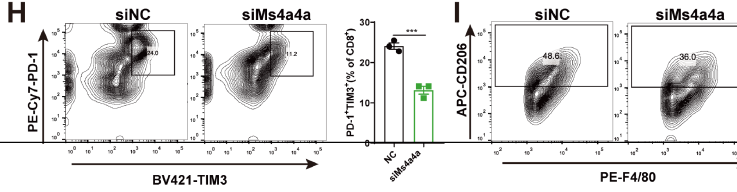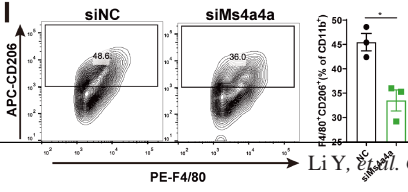

Supplement: gutjnl-2022-329147supp007.pdf [file gutjnl-2022-329147supp007.pdf]

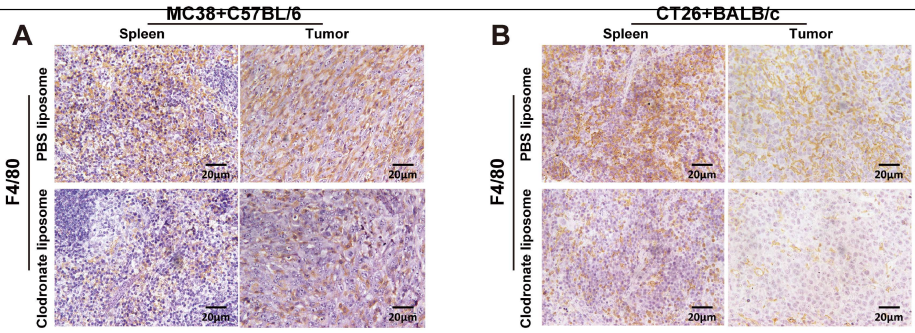

Supplement: gutjnl-2022-329147supp008.pdf [file gutjnl-2022-329147supp008.pdf]

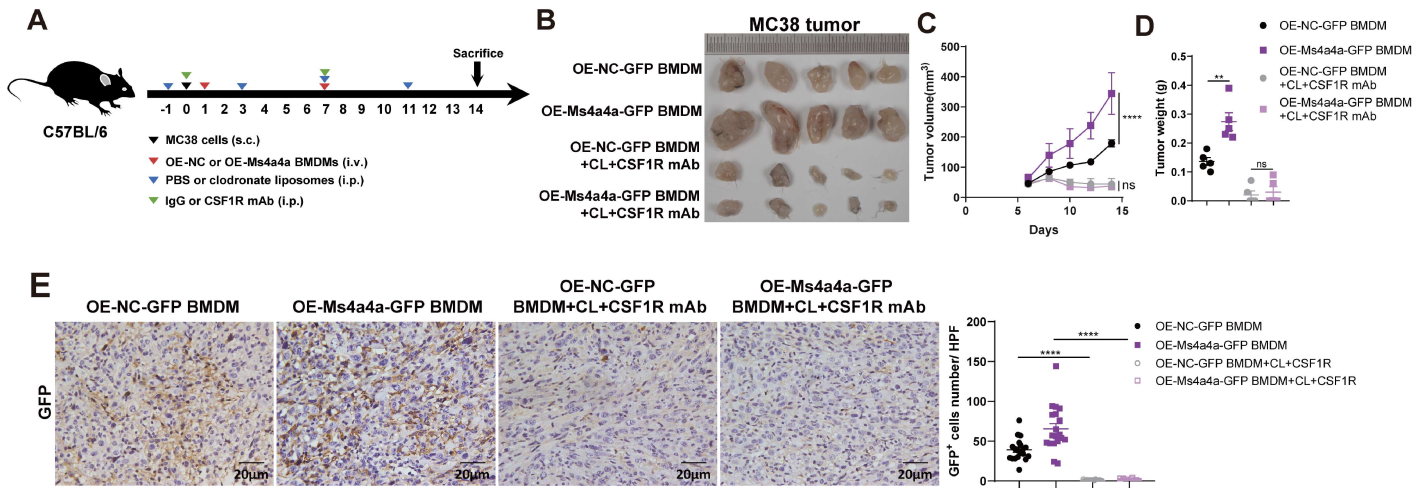

Supplement: gutjnl-2022-329147supp009.pdf [file gutjnl-2022-329147supp009.pdf]

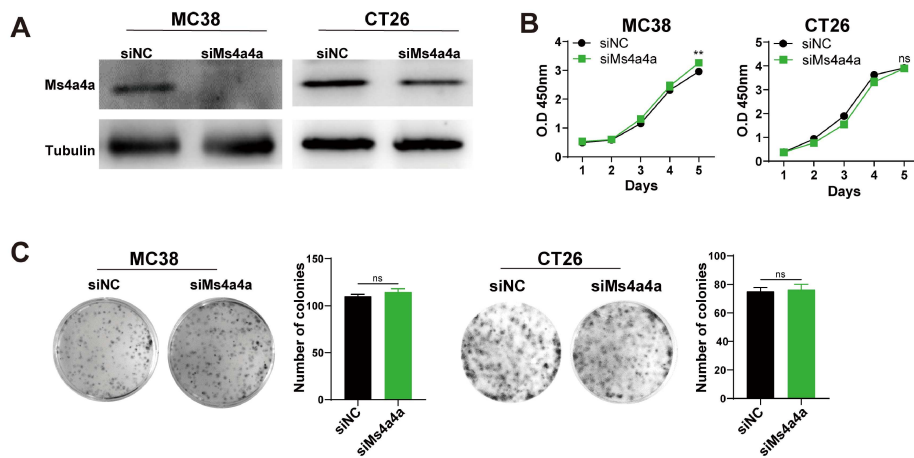

Supplement: gutjnl-2022-329147supp010.pdf [file gutjnl-2022-329147supp010.pdf]

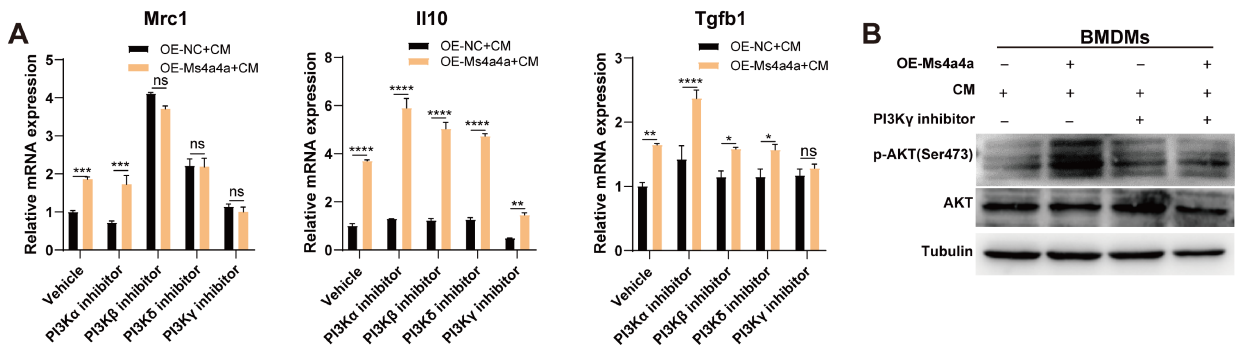

Supplement: gutjnl-2022-329147supp011.pdf [file gutjnl-2022-329147supp011.pdf]
